# Supplementary material for: Bi3+ and Eu3+ Activated Luminescent Behaviors in Non-Stoichiometric LaO0.65F1.7 Structure
Source: Materials (Basel). 2020 May 19;13(10):2326. doi: 10.3390/ma13102326 (PMC7287885; doi:10.3390/ma13102326)
Supplement: Supplementary file 1 [file materials-13-02326-s001.pdf]

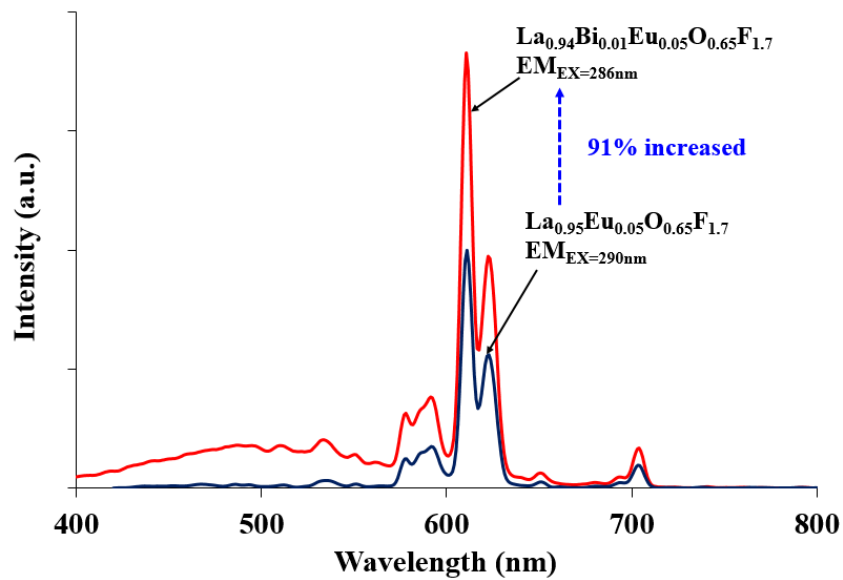

**Figure S1.** The integrated emission intensities of  $\text{La}_{0.95}\text{Eu}_{0.05}\text{O}_{0.65}\text{F}_{1.7}$  and  $\text{La}_{0.94}\text{Bi}_{0.01}\text{Eu}_{0.05}\text{O}_{0.65}\text{F}_{1.7}$  phosphors.
